# Supplementary material for: Explaining the symmetry breaking observed in the endofullerenes H2@C60, HF@C60, and H2O@C60
Source: Royal Society of Chemistry journal article supplement (doi:10.1039/c7cp06062a), 2017-01-01
Supplement: c7cp06062a1.pdf [file c7cp06062a1.pdf]

# Supplementary Information for: Explaining the symmetry breaking observed in the endofullerenes $\text{H}_2\text{@C}_{60}$ , $\text{HF@C}_{60}$ , and $\text{H}_2\text{O@C}_{60}$

Peter M. Felker,<sup>\*,†</sup> Vojtěch Vlček,<sup>†</sup> Isaac Hietanen,<sup>‡</sup> Stephen FitzGerald,<sup>‡</sup> Daniel  
Neuhauser,<sup>†</sup> and Zlatko Bačić<sup>\*,¶,§</sup>

<sup>†</sup>*Department of Chemistry and Biochemistry, University of California, Los Angeles,  
California 90095-1569, USA*

<sup>‡</sup>*Department of Physics and Astronomy, Oberlin College, Oberlin, Ohio 44074, USA*

<sup>¶</sup>*Department of Chemistry, New York University, New York, New York 10003, USA*

<sup>§</sup>*NYU-ECNU Center for Computational Chemistry at NYU Shanghai, 3663 Zhongshan  
Road North, Shanghai 200062, China*

E-mail: felker@chem.ucla.edu; zlatko.bacic@nyu.edu

## 1 Molecular and Crystal-fragment Parameters

Tables S1 and S2 summarize the geometries, inertial parameters, and BF quadrupole components that we have assumed for the  $\text{H}_2$  and  $\text{H}_2\text{O}$  moieties in computing the TR states of  $\text{H}_2\text{@C}_{60}$  and  $\text{H}_2\text{O@C}_{60}$ , respectively.

Table S3 gives the C nuclear coordinates for the  $\text{C}_{60}$  “master-cage” geometry assumed for all the  $\text{C}_{60}$  moieties relevant to this work. The geometry has shared-hexagon (6:6) CC bond lengths equal to 2.60820 bohrs (1.38020 Å) and hexagon-pentagon (6:5) CC bond lengths equal to 2.73047 bohrs (1.44490 Å). The cage-fixed cartesian axis system is centered at the

$C_{60}$  center of mass, has its  $z$  axis along one of the  $C_5$  symmetry axes of the cage, and its  $x$  axis along one of the  $C_2$  symmetry axes of the cage.

Tables S4 and S5 give the cage-center translation vectors ( $\mathbf{T}(k)$ ) and the direction-cosine matrices ( $\hat{R}(k)$ ) that define the positions and orientations of the thirteen cages in the P and H crystal fragments, respectively, w.r.t. the “space-fixed” (SF) cartesian axis system. These parameters conform to the  $C_{60}$  crystal geometries described in Sachidanandam and Harris<sup>1</sup> and Harris and Sachidanandam<sup>2</sup> for the angle  $\phi$  (defined in those papers) equal to  $24^\circ$  (P orientation) and  $84^\circ$  (H orientation). The SF frame has its origin at the center of the central cage (cage #13) and is oriented such that the  $C_3$  symmetry axis of the fragment is along the (1, 1, 1) direction. To obtain the position vector,  $\mathbf{R}_i$ , of the  $i$ th C nucleus of cage  $k$  relative to the SF frame one uses

$$\mathbf{R}_i = \mathbf{T}(k) + \hat{R}(k)\mathbf{D}_i, \quad (1)$$

where  $\mathbf{D}_i$  is the position vector, as given in Table S3, of the  $i$ th C nucleus in the cage-fixed axis system. In Tables S4 and S5, cages 1 to 6 are the “axial” and cages 7 to 12 are the “equatorial” cages in the fragment.

## 2 Basis sets, Grid Parameters, and Lennard-Jones Potential-Energy Parameters

### 2.1 $H_2@C_{60}$

#### 2.1.1 Basis Functions

The basis functions employed in the variational calculations of the TR states of  $H_2@C_{60}$  are of the form  $|n, l, m_l\rangle|j, m_j\rangle$ .

The  $|n, l, m_l\rangle$  are 3D isotropic harmonic-oscillator eigenfunctions:<sup>3</sup>

$$|n, l, m_l\rangle = N_{nl} R^l e^{-\beta R^2/2} L_k^{(l+1/2)}(\beta R^2) Y_{lm_l}(\Theta, \Phi), \quad (2)$$

where  $\beta = 2.9888989$  au,  $n = 0, 1, 2, \dots, n_{\max}$ ,  $l = n, n-2, \dots \geq 0$ ,  $k \equiv (n-l)/2$ ,  $m_l = -l, (-l+1), \dots, (l-1), l$ ,

$$N_{nl} = 2 \left[ \frac{\beta^{(2l+3/2)} 2^{k+l} k!}{\sqrt{\pi} [2(k+l)+1]!!} \right]^{1/2}, \quad (3)$$

the  $L_k^{(l+1/2)}$  are associated Laguerre polynomials, and the  $Y_{lm_l}$  are spherical harmonics. We used  $n_{\max} = 8$ .

The  $|j, m_j\rangle$  are spherical harmonics

$$|j, m_j\rangle = Y_{jm_j}(\theta, \phi), \quad (4)$$

where  $j = 0, 1, 2, \dots, j_{\max}$  and  $m_j = -j, (-j+1), \dots, (j-1), j$ . We used  $j_{\max} = 8$ .

### 2.1.2 Grid Parameters

The 5D grid described in Section 2.5 of the main body of the paper consists of (i)  $N_a = 12$  Gauss-associated-Laguerre quadrature points  $R_a$ , generated as per Felker and Bačić<sup>4</sup> for  $\beta = 2.9888989$  au, (ii)  $N_b = 10$  Gauss-Legendre quadrature points  $(\cos \beta)_b$ , (iii)  $N_c = 18$  Fourier grid points  $\alpha_c$ , (iv)  $N_d = 10$  Gauss-Legendre quadrature points  $(\cos \theta)_d$ , and (v)  $N_e = 18$  Fourier grid points  $\phi_e$ .

### 2.1.3 Kinetic-Energy Operator, $\hat{T}$

For  $\text{H}_2@\text{C}_{60}$  in the rigid-monomer approximation

$$\hat{T} = -\frac{\nabla^2}{2M} + \frac{\hat{j}^2}{2I}, \quad (5)$$

where  $\nabla^2$  is the Laplacian associated with  $\mathbf{R}$ ,  $\hat{j}^2$  is the operator corresponding to the square of the rotational angular momentum of the  $\text{H}_2$ ,  $M$  is the mass of the  $\text{H}_2$ , and  $I$  is the moment of inertia of the  $\text{H}_2$ . The inertial parameters that we have employed are given in Table S1.

### 2.1.4 Lennard-Jones Potential-Energy Parameters

The  $V_{LJ}$  PES function appearing in  $\hat{H}$  for  $\text{H}_2@\text{C}_{60}$  is taken from Xu, et al.<sup>5</sup> and is given by

$$V_{LJ} = \sum_{i=1}^3 \sum_{k=1}^{60} 4w_i \epsilon \left[ \left( \frac{\sigma}{r_{ik}} \right)^{12} - \left( \frac{\sigma}{r_{ik}} \right)^6 \right], \quad (6)$$

where  $i$  runs over the three  $\text{H}_2$  sites listed in Table S1,  $k$  runs over the 60 nuclear positions of the C atoms in the central cage,  $r_{ik}$  is the distance between site  $i$  and site  $k$ ,  $w_1 = 6.7$ ,  $w_2 = w_3 = 1$ ,  $\sigma = 5.574692$  bohrs (2.95 Å), and  $\epsilon = 3.07 \text{ cm}^{-1}$ . Of course, the  $r_{ik}$  depend on the position of the  $\text{H}_2$  moiety w.r.t. the SF axes, so  $V_{LJ}$  is a function of  $\mathbf{R}$  and  $\omega$ .

## 2.2 $\text{H}_2\text{O}@\text{C}_{60}$

### 2.2.1 Basis Functions

The basis functions employed in the variational calculations of the TR states of  $\text{H}_2\text{O}@\text{C}_{60}$  are of the form  $|n, l, m_l\rangle |j, m_j, k\rangle$ . The  $|n, l, m_l\rangle$  are the same as for  $\text{H}_2@\text{C}_{60}$  except that  $\beta = 24.38$  au. The  $|j, m_j, k\rangle$  are normalized Wigner rotation matrix elements

$$|j, m_j, k\rangle = \sqrt{\frac{2j+1}{8\pi^2}} [D_{m_j, k}^{(j)}(\phi, \theta, \chi)]^*, \quad (7)$$

where  $j = 0, 1, 2, \dots, j_{\max}$ ,  $m_j = -j, (-j+1), \dots, (j-1), j$ , and  $k = -j, (-j+1), \dots, (j-1), j$ . We used  $j_{\max} = 8$ .

### 2.2.2 Grid Parameters

The 6D grid described in Section 2.5 of the main body of the paper consisted of (i)  $N_a = 12$  Gauss-associated-Laguerre quadrature points  $R_a$ , generated as per Felker and Bačić<sup>4</sup> for  $\beta = 24.38$  au, (ii)  $N_b = 10$  Gauss-Legendre quadrature points  $(\cos \beta)_b$ , (iii)  $N_c = 18$  Fourier grid points  $\alpha_c$ , (iv)  $N_d = 10$  Gauss-Legendre quadrature points  $(\cos \theta)_d$ , and (v)  $N_e = 18$  Fourier grid points  $\phi_e$ , and (vi)  $N_f = 18$  Fourier grid points  $\chi_f$ .

### 2.2.3 Kinetic-Energy Operator, $\hat{T}$

For  $\text{H}_2\text{O}@\text{C}_{60}$  in the rigid-monomer approximation

$$\hat{T} = -\frac{\nabla^2}{2M} + \sum_{k=x,y,z} \frac{\hat{J}_k^2}{2I_k}, \quad (8)$$

where  $\nabla^2$  is the Laplacian associated with  $\mathbf{R}$ ,  $\hat{J}_k^2$  is the operator corresponding to the square of the rotational angular momentum of the  $\text{H}_2\text{O}$  about its  $k$ th principal axis,  $M$  is the mass of the  $\text{H}_2\text{O}$ , and  $I_k$  is the moment of inertia of  $\text{H}_2\text{O}$  about its  $k$ th principal axis. The inertial parameters that we have employed are given in Table S2.

### 2.2.4 Lennard-Jones Potential-Energy Parameters

The  $V_{LJ}$  PES function appearing in  $\hat{H}$  for  $\text{H}_2\text{O}@\text{C}_{60}$  is taken from Felker and Bačić<sup>8</sup> and is given by

$$V_{LJ} = \sum_{i=1}^3 \sum_{k=1}^{60} 4\epsilon_i \left[ \left( \frac{\sigma_i}{r_{ik}} \right)^{12} - \left( \frac{\sigma_i}{r_{ik}} \right)^6 \right], \quad (9)$$

where  $i$  runs over the three  $\text{H}_2\text{O}$  sites listed in Table S2,  $k$  runs over the 60 nuclear positions of the C atoms in the central cage,  $r_{ik}$  is the distance between site  $i$  and site  $k$ ,  $\sigma_1 = 6.37216$  bohrs (3.372 Å),  $\sigma_2 = \sigma_3 = 4.988877$  bohrs (2.640 Å),  $\epsilon_1 = 36.34 \text{ cm}^{-1}$ , and  $\epsilon_2 = \epsilon_3 = 8.95384 \text{ cm}^{-1}$ . The  $r_{ik}$  depend on the position of the  $\text{H}_2\text{O}$  moiety w.r.t. the SF axes, so  $V_{LJ}$  is a function of  $\mathbf{R}$  and  $\omega$ .

### 3 Transformation properties of the electric-field-gradient tensor, $I_m^{(2)}$

For arbitrary charge density  $\rho(\mathbf{r})$  the internal moments of rank 2 (the components of the electric-field-gradient tensor) are given by<sup>6</sup>

$$I_m^{(2)} \equiv \int \frac{\rho(\mathbf{r})}{r^3} C_m^{(2)}(\hat{r}) d\mathbf{r} = \sqrt{\frac{4\pi}{5}} \int \frac{\rho(\mathbf{r})}{r^3} Y_{2m}(\hat{r}) d\mathbf{r}. \quad (10)$$

We examine below how these moments transform subject to (a) inversion through the origin and (b) rotation about an axis going through the origin.

#### 3.1 Transformation by inversion

Inversion (operation  $E^*$ ) changes the charge density  $\rho(\mathbf{r})$  to  $\rho'(\mathbf{r})$  such that

$$\rho'(\mathbf{r}) = \rho(-\mathbf{r}). \quad (11)$$

The internal moments corresponding to this new charge density are given by

$$\begin{aligned} I_m^{(2)}(E^*) &= \sqrt{\frac{4\pi}{5}} \int \frac{\rho'(\mathbf{r})}{r^3} Y_{2m}(\hat{r}) d\mathbf{r} = \sqrt{\frac{4\pi}{5}} \int \frac{\rho(-\mathbf{r})}{r^3} Y_{2m}(\hat{r}) d\mathbf{r} \\ &= \sqrt{\frac{4\pi}{5}} \int \frac{\rho(\mathbf{r}')}{r'^3} Y_{2m}(-\hat{r}') d\mathbf{r}', \end{aligned} \quad (12)$$

where we have substituted  $\mathbf{r}' = -\mathbf{r}$  to obtain the final equality. Since  $Y_{2m}(-\hat{r}') = Y_{2m}(\hat{r}')$ , one sees from Eqs. (10) and (12) that

$$I_m^{(2)}(E^*) = I_m^{(2)}. \quad (13)$$

Inversion leaves internal moments of rank 2 unchanged.

### 3.2 Transformation by rotation about an axis through the origin

We start by expressing  $\rho(\mathbf{r})$  as an expansion over spherical harmonics

$$\rho(\mathbf{r}) = \sum_{l,m} a_{lm}(r) Y_{lm}(\hat{r}), \quad (14)$$

where

$$a_{lm}(r) = \int \rho(\mathbf{r}) Y_{lm}^*(\hat{r}) d\hat{r}. \quad (15)$$

Next we substitute this expansion for  $\rho(\mathbf{r})$  into Eq. (10) to obtain

$$\begin{aligned} I_m^{(2)} &= \sqrt{\frac{4\pi}{5}} \sum_{l,m'} \int \frac{a_{lm'}(r)}{r^3} Y_{lm'}(\hat{r}) Y_{2m}(\hat{r}) d\mathbf{r} \\ &= \sqrt{\frac{4\pi}{5}} (-)^m \int \frac{a_{2,-m}(r)}{r^3} dr, \end{aligned} \quad (16)$$

where the last equality in Eq. (16) follows from the orthonormality of the spherical harmonics and the fact that

$$Y_{lm}^* = (-)^m Y_{l,-m}. \quad (17)$$

Now we rotate the charge density  $\rho(\mathbf{r})$  through an angle  $\gamma$  about an axis  $\hat{n}$  going through the origin. The density is transformed as follows

$$e^{-i\hat{J}_n\gamma} \rho(\mathbf{r}) = \sum_{l,m} a_{lm}(r) [e^{-i\hat{J}_n\gamma} Y_{lm}(\hat{r})], \quad (18)$$

where  $\hat{J}_n$  is the operator corresponding to angular momentum about  $\hat{n}$ .

Consider the new  $I_m^{(2)}$  – call them  $I_m^{(2)}(\hat{n}, \gamma)$  – corresponding to this rotated density

$$\begin{aligned} \sqrt{\frac{5}{4\pi}} I_m^{(2)}(\hat{n}, \gamma) &= \int \frac{[e^{-i\hat{J}_n\gamma} \rho(\mathbf{r})]}{r^3} Y_{2m}(\hat{r}) d\mathbf{r} \\ &= \sum_{l,m'} \int \frac{a_{l,m'}(r)}{r^3} dr \int [e^{-i\hat{J}_n\gamma} Y_{lm'}] Y_{2m} d\hat{r}. \end{aligned} \quad (19)$$

Now

$$e^{-i\hat{J}_n\gamma}Y_{lm'}(\hat{r}) = \sum_{m''} A_{m'',m'}^{(l)}(\hat{n}, \gamma)Y_{lm''}(\hat{r}), \quad (20)$$

where

$$A_{m'',m'}^{(l)}(\hat{n}, \gamma) \equiv \int Y_{lm''}^*(\hat{r})e^{-i\hat{J}_n\gamma}Y_{lm'}(\hat{r})d\hat{r}. \quad (21)$$

Substituting Eq. (20) into Eq. (19) one obtains

$$\begin{aligned} \sqrt{\frac{5}{4\pi}}I_m^{(2)}(\hat{n}, \gamma) &= \sum_{l,m'} \left[ \int \frac{a_{l,m'}(r)}{r^3} dr \times \sum_{m''} A_{m'',m'}^{(l)}(\hat{n}, \gamma) \int Y_{lm''}(\hat{r})Y_{2m}(\hat{r})d\hat{r} \right] \\ &= \sum_{m'} (-)^m A_{-m,m'}^{(2)}(\hat{n}, \gamma) \int \frac{a_{2,m'}(r)}{r^3} dr. \end{aligned} \quad (22)$$

By using Eq. (16) one then obtains

$$I_m^{(2)}(\hat{n}, \gamma) = \sum_{m'} (-)^{m+m'} A_{-m,m'}^{(2)}(\hat{n}, \gamma) I_{-m'}^{(2)} = \sum_{m'} (-)^{m+m'} A_{-m,-m'}^{(2)}(\hat{n}, \gamma) I_{m'}^{(2)}. \quad (23)$$

What remains is to evaluate the  $A_{m,m'}^{(2)}(\hat{n}, \gamma)$ . If one specifies the direction of the axis  $\hat{n}$  by its polar angle  $\beta$  and azimuthal angle  $\alpha$ , it is straightforward to show that

$$A_{m,m'}^{(l)}(\alpha, \beta, \gamma) \equiv A_{m,m'}^{(l)}(\hat{n}, \gamma) = e^{i(m'-m)\alpha} \sum_{m''} e^{-im''\gamma} d_{m,m''}^{(l)}(\beta) d_{m',m''}^{(l)}(\beta), \quad (24)$$

where the  $d_{m,m'}^{(l)}(\beta)$  are little- $d$  Wigner rotation matrix elements. From Eq. (24), one can also easily show that

$$(-)^{m+m'} A_{-m,-m'}^{(l)}(\hat{n}, \gamma) = [A_{m,m'}^{(l)}(\hat{n}, \gamma)]^* \quad (25)$$

and that

$$(-)^{m+m'} A_{-m,-m'}^{(l)}(\hat{n}, -\gamma) = A_{m',m}^{(l)}(\hat{n}, \gamma). \quad (26)$$

Finally, with Eqs. (23), (25), and (26)

$$I_m^{(2)}(\hat{n}, \gamma) = \sum_{m'} [A_{m,m'}^{(2)}(\hat{n}, \gamma)]^* I_{m'}^{(2)} \quad (27)$$

and

$$I_m^{(2)}(\hat{n}, -\gamma) = \sum_{m'} A_{m',m}^{(2)}(\hat{n}, \gamma) I_{m'}^{(2)}. \quad (28)$$

Relevant to the M@C<sub>60</sub> crystal-fragment geometries in this work are the rotations by  $\pm 2\pi/3$  about  $\hat{n}$  when  $\hat{n}$  lies along the (1,1,1) direction, so that  $\beta = \cos^{-1}(\sqrt{1/3})$  and  $\alpha = \pi/4$ . Evaluation of Eq. (24) for  $\gamma = +2\pi/3$  about this axis and for  $l = 2$  yields the matrix of values

$$\mathbf{B} \equiv \mathbf{A}^{(2)}(\pi/4, \cos^{-1}(\sqrt{1/3}), 2\pi/3) = \begin{pmatrix} -\frac{1}{4} & \frac{1}{2} & -\sqrt{\frac{3}{8}} & \frac{1}{2} & -\frac{1}{4} \\ \frac{i}{2} & -\frac{i}{2} & 0 & \frac{i}{2} & -\frac{i}{2} \\ \sqrt{\frac{3}{8}} & 0 & -\frac{1}{2} & 0 & \sqrt{\frac{3}{8}} \\ -\frac{i}{2} & -\frac{i}{2} & 0 & \frac{i}{2} & \frac{i}{2} \\ -\frac{1}{4} & -\frac{1}{2} & -\sqrt{\frac{3}{8}} & -\frac{1}{2} & -\frac{1}{4} \end{pmatrix}, \quad (29)$$

where the rows run from  $m = -2$  to 2 and the columns from  $m' = -2$  to 2.

### 3.3 Invariant $I_m^{(2)}$ for the M@C<sub>60</sub> Crystal Fragment

For this work we take the P and H crystal fragments to be invariant under the operations of the  $S_6$  point group. In addition, we have chosen SF cartesian axes such that the  $C_3$  symmetry axis of  $S_6$  points along the (1,1,1) direction. Since the internal moments due to the NN cages must be invariant to a  $2\pi/3$  rotation about the  $C_3$  axis, then given Eqs. (27)

and (29), the following must be obeyed

$$\mathbf{B}^* I^{(2)} = I^{(2)}, \quad (30)$$

where  $I^{(2)}$  is the column vector composed of internal moments produced by the charge density of the twelve NN cages

$$I^{(2)} \equiv \begin{pmatrix} I_{-2}^{(2)} \\ I_{-1}^{(2)} \\ I_0^{(2)} \\ I_{+1}^{(2)} \\ I_{+2}^{(2)} \end{pmatrix}. \quad (31)$$

Equation (30) is satisfied if  $I^{(2)}$  is an eigenvector of  $\mathbf{B}^*$  having eigenvalue equal to +1. These eigenvectors can be straightforwardly determined. They are given by

$$I^{(2)} = A \begin{pmatrix} i \\ (-1 + i) \\ 0 \\ (1 + i) \\ -i \end{pmatrix}, \quad (32)$$

where, in general,  $A$  is a complex constant.

## 4 Perturbation theory applied to $j = 1$ level splittings

### 4.1 $\text{H}_2@\text{C}_{60}$ and $\text{HF}@\text{C}_{60}$

We take the lowest-energy zeroth-order TR states of  $\text{H}_2@\text{C}_{60}$  and  $\text{HF}@\text{C}_{60}$  to be of the form  $|T_0\rangle|j, m_j\rangle$ ,<sup>7</sup> where  $|T_0\rangle$  depends only on  $\mathbf{R}$  and  $|j, m_j\rangle$  is a rigid-rotor rotational eigenfunction. The matrix elements of  $V_{\text{quad}}$  connecting the states of a given  $j$  level are then given by

$$\langle T_0, j, m'_j | V_{\text{quad}} | T_0, j, m_j \rangle = \sum_m (-)^m I_{-m}^{(2)} \langle T_0, j, m'_j | Q_m^{(2)} | T_0, j, m_j \rangle. \quad (33)$$

By using Eq. (15) of the main text

$$\begin{aligned} \langle T_0, j, m'_j | Q_m^{(2)} | T_0, j, m_j \rangle &= Q_0^{\text{BF}} \langle j, m'_j | [D_{m,0}^{(2)}(\omega)]^* | j, m_j \rangle \\ &+ (-)^m \sqrt{40\pi\mu_z} \sum_{m'} \begin{pmatrix} 1 & 1 & 2 \\ m' & m - m' & -m \end{pmatrix} \\ &\times \langle T_0 | RY_{1,m'}(\Theta, \Phi) | T_0 \rangle \langle j, m'_j | [D_{m-m',0}^{(1)}(\omega)]^* | j, m_j \rangle. \end{aligned} \quad (34)$$

Now the  $|T_0, j, m_j\rangle$  have inversion symmetry (due to the  $I_h$  environment imposed by the central  $\text{C}_{60}$  cage), as do the  $|j, m_j\rangle$ . In consequence,  $|T_0\rangle$  also has inversion symmetry. The upshot is that the factors  $\langle T_0 | RY_{1,m'}(\Theta, \Phi) | T_0 \rangle$  appearing in Eq. (34) are zero by symmetry, since  $RY_{1,m'}(\Theta, \Phi)$  changes sign upon inversion. Thus we need only consider the first term on the rhs of Eq. (34). One finds

$$\langle T_0, j, m'_j | Q_m^{(2)} | T_0, j, m_j \rangle = (-)^{m'_j} (2j+1) Q_0^{\text{BF}} \begin{pmatrix} j & j & 2 \\ 0 & 0 & 0 \end{pmatrix} \begin{pmatrix} j & j & 2 \\ -m'_j & m_j & m \end{pmatrix}. \quad (35)$$

Substituting Eq. (35) into Eq. (33) one obtains

$$\begin{aligned} \langle T_0, j, m'_j | V_{\text{quad}} | T_0, j, m_j \rangle &= (-)^{m_j} I_{m_j - m'_j}^{(2)} \begin{pmatrix} j & j & 2 \\ -m'_j & m_j & m'_j - m_j \end{pmatrix} \\ &\times (2j + 1) Q_0^{\text{BF}} \begin{pmatrix} j & j & 2 \\ 0 & 0 & 0 \end{pmatrix}. \end{aligned} \quad (36)$$

These matrix elements are readily evaluated for a given value of  $j$ . For  $j = 1$  the full matrix (rows labeled by  $m'_j = -1, 0, 1$  and columns by  $m_j = -1, 0, 1$ ) is given by

$$\langle T_0, 1, \{m'_j\} | V_{\text{quad}} | T_0, 1, \{m_j\} \rangle = \frac{\sqrt{6}}{5} Q_0^{\text{BF}} A \begin{pmatrix} 0 & -\frac{(1+i)}{\sqrt{2}} & i \\ -\frac{(1-i)}{\sqrt{2}} & 0 & \frac{(1+i)}{\sqrt{2}} \\ -i & \frac{(1-i)}{\sqrt{2}} & 0 \end{pmatrix}, \quad (37)$$

where we have used Eq. (32) for the  $I_m^{(2)}$ . This matrix has eigenvalues  $\frac{\sqrt{6}}{5} Q_0^{\text{BF}} A$ ,  $\frac{\sqrt{6}}{5} Q_0^{\text{BF}} A$ , and  $-2\frac{\sqrt{6}}{5} Q_0^{\text{BF}} A$ . These are the first-order corrections to the energies of the  $j = 1$  states and give

$$\Delta_{\text{PT}} \equiv E(g = 2) - E(g = 1) = 3A \frac{\sqrt{6}}{5} Q_0^{\text{BF}}, \quad (38)$$

consistent with Eqs. (17) and (18) of the main text.

## 4.2 H<sub>2</sub>O@C<sub>60</sub>

For H<sub>2</sub>O@C<sub>60</sub> the lowest-energy zeroth-order states<sup>8</sup> are very well-approximated by  $|T_0\rangle |j_{k_a k_c}, m_j\rangle$ , where  $|T_0\rangle$  depends only on  $\mathbf{R}$ ,

$$|j_{k_a k_c}, m_j\rangle = \sum_k a(j_{k_a k_c}, k) |j, m_j, k\rangle \quad (39)$$

is an eigenfunction of the rigid-H<sub>2</sub>O rotational Hamiltonian, and the  $|j, m_j, k\rangle$  are symmetric-top rotational eigenfunctions

$$|j, m_j, k\rangle = \sqrt{\frac{2j+1}{8\pi^2}} [D_{m_j, k}^{(j)}(\omega)]^*. \quad (40)$$

Matrix elements of  $V_{\text{quad}}$  connecting states of a given  $|T_0, j_{k_a k_c}\rangle$  level are given by

$$\langle T_0, j_{k_a k_c}, m'_j | V_{\text{quad}} | T_0, j_{k_a k_c}, m_j \rangle = \sum_m (-)^m I_{-m}^{(2)} \langle T_0, j_{k_a k_c}, m'_j | Q_m^{(2)} | T_0, j_{k_a k_c}, m_j \rangle. \quad (41)$$

To evaluate the matrix elements on the rhs of Eq. (41) we use Eq. (15) of the main text and note that, as for H<sub>2</sub> and HF,  $|T_0\rangle$  has definite parity. Thus,

$$\langle T_0 | RY_{1, m'}(\Theta, \Phi) | T_0 \rangle = 0 \quad (42)$$

and

$$\langle T_0, j_{k_a k_c}, m'_j | Q_m^{(2)} | T_0, j_{k_a k_c}, m_j \rangle = \sum_{q=-2}^2 Q_q^{\text{BF}} \langle j_{k_a k_c}, m'_j | [D_{m, q}^{(2)}]^* | j_{k_a k_c}, m_j \rangle. \quad (43)$$

By using Eqs. (39) and (40)

$$\begin{aligned} \langle j_{k_a k_c}, m'_j | [D_{m, q}^{(2)}]^* | j_{k_a k_c}, m_j \rangle &= \sum_{k, k'} a(j_{k_a k_c}, k') a(j_{k_a k_c}, k) \langle j, m'_j, k' | [D_{m, q}^{(2)}]^* | j, m_j, k \rangle \\ &= (-)^{m'_j} (2j+1) \begin{pmatrix} j & j & 2 \\ -m'_j & m_j & m \end{pmatrix} \\ &\times \sum_{k, k'} (-)^{k'} a(j_{k_a k_c}, k') a(j_{k_a k_c}, k) \begin{pmatrix} j & j & 2 \\ -k' & k & q \end{pmatrix}. \end{aligned} \quad (44)$$

Substituting Eq. (44) into Eq. (43) and then the latter into Eq. (41) one obtains

$$\begin{aligned} \langle T_0, j_{k_a k_c}, m'_j | V_{\text{quad}} | T_0, j_{k_a k_c}, m_j \rangle &= (-)^{m_j} I_{m_j - m'_j}^{(2)} \begin{pmatrix} j & j & 2 \\ -m'_j & m_j & m'_j - m_j \end{pmatrix} \\ &\times (2j + 1) \sum_q Q_q^{\text{BF}} \sum_{k', k} (-)^{k'} a(j_{k_a k_c}, k') a(j_{k_a k_c}, k) \begin{pmatrix} j & j & 2 \\ -k' & k & q \end{pmatrix}. \end{aligned} \quad (45)$$

For  $j = 1$  the Eq.-(45) matrix (rows labeled by  $m'_j = -1, 0, 1$  and columns by  $m_j = -1, 0, 1$ ) is given by

$$\langle T_0, 1_{k_a k_c}, \{m'_j\} | V_{\text{quad}} | T_0, 1_{k_a k_c}, \{m_j\} \rangle = Af(Q^{\text{BF}}) \begin{pmatrix} 0 & -\frac{(1+i)}{\sqrt{2}} & i \\ -\frac{(1-i)}{\sqrt{2}} & 0 & \frac{(1+i)}{\sqrt{2}} \\ -i & \frac{(1-i)}{\sqrt{2}} & 0 \end{pmatrix}, \quad (46)$$

where we have used Eq. (32) for the  $I_m^{(2)}$  and

$$f(Q^{\text{BF}}) \equiv \frac{3}{\sqrt{5}} \left[ \sum_q Q_q^{\text{BF}} \sum_{k', k} (-)^{k'} a(j_{k_a k_c}, k') a(j_{k_a k_c}, k) \begin{pmatrix} 1 & 1 & 2 \\ -k' & k & q \end{pmatrix} \right]. \quad (47)$$

Diagonalization of Eq. (46) yields the eigenvalues  $Af(Q^{\text{BF}})$ ,  $Af(Q^{\text{BF}})$ , and  $-2Af(Q^{\text{BF}})$  and the level splitting

$$\Delta_{\text{PT}} = E(g = 2) - E(g = 1) = 3Af(Q^{\text{BF}}). \quad (48)$$

For the  $1_{01}$  level, the *ortho* ground state,

$$a(1_{01}, 1) = -a(1_{01}, -1) = \frac{1}{\sqrt{2}} \quad a(1_{01}, 0) = 0 \quad (49)$$

and

$$f(Q^{\text{BF}}, 1_{01}) = \frac{3}{5} \left[ -\frac{1}{\sqrt{6}} Q_0^{\text{BF}} + \frac{1}{2} (Q_2^{\text{BF}} + Q_{-2}^{\text{BF}}) \right]. \quad (50)$$

For the first excited rotational state of the *ortho* species,  $1_{10}$ ,

$$a(1_{01}, 1) = a(1_{01}, -1) = \frac{1}{\sqrt{2}} \quad a(1_{01}, 0) = 0 \quad (51)$$

and

$$f(Q^{\text{BF}}, 1_{10}) = \frac{3}{5} \left[ +\frac{1}{\sqrt{6}} Q_0^{\text{BF}} + \frac{1}{2} (Q_2^{\text{BF}} + Q_{-2}^{\text{BF}}) \right]. \quad (52)$$

Finally, for the first excited rotational state of the *para* species,  $1_{11}$ ,

$$a(1_{11}, 1) = a(1_{11}, -1) = 0 \quad a(1_{11}, 0) = 1 \quad (53)$$

and

$$f(Q^{\text{BF}}, 1_{11}) = \frac{\sqrt{6}}{5} Q_0^{\text{BF}}. \quad (54)$$

## References

- (1) R. Sachidanandam and A. B. Harris, Phys. Rev. Lett. **67**, 1467 (1991).
- (2) A. B. Harris and R. Sachidanandam, Phys. Rev. B **46**, 4944 (1992).
- (3) For example, see [https://en.wikipedia.org/wiki/Quantum\\_harmonic\\_oscillator](https://en.wikipedia.org/wiki/Quantum_harmonic_oscillator)
- (4) See P. M. Felker and Z. Bačić, J. Chem. Phys. **145**, 084310 (2016), Supplementary Material, Section II.
- (5) M. Xu, S. Ye, A. Powers, R. Lawler, N. J. Turro, and Z. Bačić, J. Chem. Phys. **139**, 064309 (2013).
- (6) For example, For example, R. N. Zare, *Angular Momentum* (Wiley, New York, 1988), Eq. (7), p. 246.
- (7) For example, M. Xu, F. Sebastianelli, Z. Bačić, R. Lawler, and N. J. Turro, J. Chem. Phys. **128**, 011101 (2008).
- (8) P. M. Felker and Z. Bačić, J. Chem. Phys. **145**, 084310 (2016).

Table 1: H<sub>2</sub> BF site coordinates (in bohrs), site masses (in amu), rotational constant (in cm<sup>-1</sup>), and BF quadrupole (in au).

| Site #                    | $x$      | $y$      | $z$       | mass   |
|---------------------------|----------|----------|-----------|--------|
| 1                         | 0.000000 | 0.000000 | 0.000000  | 0.0000 |
| 2                         | 0.000000 | 0.000000 | +0.699199 | 1.0078 |
| 3                         | 0.000000 | 0.000000 | -0.699199 | 1.0078 |
| $(2I)^{-1} = 58.378$      |          |          |           |        |
| $Q_0^{\text{BF}} = 0.499$ |          |          |           |        |

Table 2: H<sub>2</sub>O BF site coordinates (in bohrs), site masses (in amu), rotational constants (in cm<sup>-1</sup>), and BF quadrupole and dipole components (in au).

| Site #              | $x$                       | $y$                       | $z$       | mass    |
|---------------------|---------------------------|---------------------------|-----------|---------|
| 1                   | 0.000000                  | 0.000000                  | 0.125534  | 15.9949 |
| 2                   | 1.453650                  | 0.000000                  | -0.996156 | 1.0078  |
| 3                   | -1.453650                 | 0.000000                  | -0.996156 | 1.0078  |
| $(2I_x)^{-1}$       | $(2I_y)^{-1}$             | $(2I_z)^{-1}$             |           |         |
| 27.877              | 9.285                     | 14.512                    |           |         |
| $Q_0^{(\text{BF})}$ | $Q_{\pm 2}^{(\text{BF})}$ | $\vec{\mu} = \mu \hat{z}$ |           |         |
| -0.09973            | 1.53843                   | -0.737196                 |           |         |

Table 3: Carbon nuclear coordinates (in bohrs) for the “master cage”  $C_{60}$  geometry. Coordinates are referenced to a cage-fixed cartesian axis system having its origin at the center of the cage, its  $z$  axis along one of the  $C_5$  symmetry axes of the cage, and its  $x$  axis along one of the  $C_2$  symmetry axes of the cage.

| C nucleus | $x$       | $y$       | $z$       |
|-----------|-----------|-----------|-----------|
| 1         | 0.000000  | 2.322672  | 6.238707  |
| 2         | -2.208993 | 0.717744  | 6.238707  |
| 3         | -1.365233 | -1.879081 | 6.238707  |
| 4         | 1.365233  | -1.879081 | 6.238707  |
| 5         | 2.208993  | 0.717744  | 6.238707  |
| 6         | 4.319071  | 1.403350  | 4.867496  |
| 7         | 5.684303  | -0.475731 | 3.432005  |
| 8         | 4.878326  | -2.956276 | 3.432005  |
| 9         | 2.669332  | -3.674020 | 4.867496  |
| 10        | 1.304100  | -5.553102 | 3.432005  |
| 11        | -1.304100 | -5.553102 | 3.432005  |
| 12        | -2.669332 | -3.674020 | 4.867496  |
| 13        | -4.878326 | -2.956276 | 3.432005  |
| 14        | -5.684303 | -0.475731 | 3.432005  |
| 15        | -4.319071 | 1.403350  | 4.867496  |
| 16        | -4.319071 | 3.726024  | 3.432005  |
| 17        | -5.684303 | 3.282433  | 1.109333  |
| 18        | -6.528064 | 0.685606  | 1.109333  |
| 19        | -6.528064 | -0.685606 | -1.109333 |
| 20        | -5.684303 | -3.282433 | -1.109333 |
| 21        | -4.878326 | -4.391767 | 1.109333  |
| 22        | -2.669332 | -5.996694 | 1.109333  |
| 23        | -1.365233 | -6.420422 | -1.109333 |

|    |           |           |           |
|----|-----------|-----------|-----------|
| 24 | 1.365233  | -6.420422 | -1.109333 |
| 25 | 2.669332  | -5.996694 | 1.109333  |
| 26 | 4.878326  | -4.391767 | 1.109333  |
| 27 | 5.684303  | -3.282433 | -1.109333 |
| 28 | 6.528064  | -0.685606 | -1.109333 |
| 29 | 6.528064  | 0.685606  | 1.109333  |
| 30 | 5.684303  | 3.282433  | 1.109333  |
| 31 | 4.878326  | 4.391767  | -1.109333 |
| 32 | 4.878326  | 2.956276  | -3.432005 |
| 33 | 5.684303  | 0.475731  | -3.432005 |
| 34 | 4.319071  | -1.403350 | -4.867496 |
| 35 | 4.319071  | -3.726024 | -3.432005 |
| 36 | 2.208993  | -5.259085 | -3.432005 |
| 37 | 0.000000  | -4.541340 | -4.867496 |
| 38 | -2.208993 | -5.259085 | -3.432005 |
| 39 | -4.319071 | -3.726024 | -3.432005 |
| 40 | -4.319071 | -1.403350 | -4.867496 |
| 41 | -5.684303 | 0.475731  | -3.432005 |
| 42 | -4.878326 | 2.956276  | -3.432005 |
| 43 | -4.878326 | 4.391767  | -1.109333 |
| 44 | -2.669332 | 5.996694  | -1.109333 |
| 45 | -1.304100 | 5.553102  | -3.432005 |
| 46 | -2.669332 | 3.674020  | -4.867496 |
| 47 | -1.365233 | 1.879081  | -6.238707 |
| 48 | -2.208993 | -0.717744 | -6.238707 |
| 49 | 0.000000  | -2.322672 | -6.238707 |
| 50 | 2.208993  | -0.717744 | -6.238707 |

|    |           |          |           |
|----|-----------|----------|-----------|
| 51 | 1.365233  | 1.879081 | −6.238707 |
| 52 | 2.669332  | 3.674020 | −4.867496 |
| 53 | 1.304100  | 5.553102 | −3.432005 |
| 54 | 2.669332  | 5.996694 | −1.109333 |
| 55 | 1.365233  | 6.420422 | 1.109333  |
| 56 | −1.365233 | 6.420422 | 1.109333  |
| 57 | −2.208993 | 5.259085 | 3.432005  |
| 58 | 0.000000  | 4.541340 | 4.867496  |
| 59 | 2.208993  | 5.259085 | 3.432005  |
| 60 | 4.319071  | 3.726024 | 3.432005  |

---



---

Table 4: Cage center translation vector,  $\mathbf{T}$  (in bohrs) and rotation matrix,  $\hat{R}$ , defining the position of each of the cages in the 13-cage fragment corresponding to the P orientation of  $\text{M@C}_{60}(s)$ .

| Cage # ( $k$ ) | $\mathbf{T}(k)$                    | $\hat{R}(k)$                                                                                                                            |
|----------------|------------------------------------|-----------------------------------------------------------------------------------------------------------------------------------------|
| 1              | (13.265878, 0.000000, 13.265878)   | $\begin{pmatrix} 0.556377 & -0.457993 & -0.693316 \\ -0.566903 & 0.400811 & -0.719702 \\ 0.607508 & 0.793469 & -0.036636 \end{pmatrix}$ |
| 2              | (0.000000, 13.265878, 13.265878)   | $\begin{pmatrix} 0.556377 & -0.457993 & -0.693316 \\ 0.566903 & -0.400811 & 0.719702 \\ -0.607508 & -0.793469 & 0.036636 \end{pmatrix}$ |
| 3              | (13.265878, 13.265878, 0.000000)   | $\begin{pmatrix} -0.556377 & 0.457993 & 0.693316 \\ -0.566903 & 0.400811 & -0.719702 \\ -0.607508 & -0.793469 & 0.036636 \end{pmatrix}$ |
| 4              | (-13.265878, 0.000000, -13.265878) | $\begin{pmatrix} 0.556377 & -0.457993 & -0.693316 \\ -0.566903 & 0.400811 & -0.719702 \\ 0.607508 & 0.793469 & -0.036636 \end{pmatrix}$ |
| 5              | (0.000000, -13.265878, -13.265878) | $\begin{pmatrix} 0.556377 & -0.457993 & -0.693316 \\ 0.566903 & -0.400811 & 0.719702 \\ -0.607508 & -0.793469 & 0.036636 \end{pmatrix}$ |

$$6 \quad (-13.265878, -13.265878, 0.000000) \quad \begin{pmatrix} -0.556377 & 0.457993 & 0.693316 \\ -0.566903 & 0.400811 & -0.719702 \\ -0.607508 & -0.793469 & 0.036636 \end{pmatrix}$$

$$7 \quad (0.000000, 13.265878, -13.265878) \quad \begin{pmatrix} 0.556377 & -0.457993 & -0.693316 \\ 0.566903 & -0.400811 & 0.719702 \\ -0.607508 & -0.793469 & 0.036636 \end{pmatrix}$$

$$8 \quad (13.265878, 0.000000, -13.265878) \quad \begin{pmatrix} 0.556377 & -0.457993 & -0.693316 \\ -0.566903 & 0.400811 & -0.719702 \\ 0.607508 & 0.793469 & -0.036636 \end{pmatrix}$$

$$9 \quad (0.000000, -13.265878, 13.265878) \quad \begin{pmatrix} 0.556377 & -0.457993 & -0.693316 \\ 0.566903 & -0.400811 & 0.719702 \\ -0.607508 & -0.793469 & 0.036636 \end{pmatrix}$$

$$10 \quad (13.265878, -13.265878, 0.000000) \quad \begin{pmatrix} -0.556377 & 0.457993 & 0.693316 \\ -0.566903 & 0.400811 & -0.719702 \\ -0.607508 & -0.793469 & 0.036636 \end{pmatrix}$$

$$11 \quad (-13.265878, 0.000000, 13.265878) \quad \begin{pmatrix} 0.556377 & -0.457993 & -0.693316 \\ -0.566903 & 0.400811 & -0.719702 \\ 0.607508 & 0.793469 & -0.036636 \end{pmatrix}$$

$$12 \quad (-13.265878, 13.265878, 0.000000) \quad \begin{pmatrix} -0.556377 & 0.457993 & 0.693316 \\ -0.566903 & 0.400811 & -0.719702 \\ -0.607508 & -0.793469 & 0.036636 \end{pmatrix}$$

|    |                                  |                                                                                                                                       |
|----|----------------------------------|---------------------------------------------------------------------------------------------------------------------------------------|
| 13 | $(0.000000, 0.000000, 0.000000)$ | $\begin{pmatrix} -0.556377 & 0.457993 & 0.693316 \\ 0.566903 & -0.400811 & 0.719702 \\ 0.607508 & 0.793469 & -0.036636 \end{pmatrix}$ |
|----|----------------------------------|---------------------------------------------------------------------------------------------------------------------------------------|

---

Table 5: Cage center translation vector,  $\mathbf{T}$  (in bohrs) and rotation matrix,  $\hat{R}$ , defining the position of each of the cages in the 13-cage fragment corresponding to the H orientation of  $\text{M@C}_{60}(s)$ .

| Cage # ( $k$ ) | $\mathbf{T}(k)$                    | $\hat{R}(k)$                                                                                                                              |
|----------------|------------------------------------|-------------------------------------------------------------------------------------------------------------------------------------------|
| 1              | (13.265878, 0.000000, 13.265878)   | $\begin{pmatrix} 0.154881 & -0.967912 & -0.197886 \\ 0.195485 & 0.226368 & -0.954224 \\ 0.968400 & 0.109107 & 0.224272 \end{pmatrix}$     |
| 2              | (0.000000, 13.265878, 13.265878)   | $\begin{pmatrix} 0.154881 & -0.967912 & -0.197886 \\ -0.195485 & -0.226368 & 0.954224 \\ -0.968400 & -0.109107 & -0.224272 \end{pmatrix}$ |
| 3              | (13.265878, 13.265878, 0.000000)   | $\begin{pmatrix} -0.154881 & 0.967912 & 0.197886 \\ 0.195485 & 0.226368 & -0.954224 \\ -0.968400 & -0.109107 & -0.224272 \end{pmatrix}$   |
| 4              | (-13.265878, 0.000000, -13.265878) | $\begin{pmatrix} 0.154881 & -0.967912 & -0.197886 \\ 0.195485 & 0.226368 & -0.954224 \\ 0.968400 & 0.109107 & 0.224272 \end{pmatrix}$     |
| 5              | (0.000000, -13.265878, -13.265878) | $\begin{pmatrix} 0.154881 & -0.967912 & -0.197886 \\ -0.195485 & -0.226368 & 0.954224 \\ -0.968400 & -0.109107 & -0.224272 \end{pmatrix}$ |

$$6 \quad (-13.265878, -13.265878, 0.000000) \quad \begin{pmatrix} -0.154881 & 0.967912 & 0.197886 \\ 0.195485 & 0.226368 & -0.954224 \\ -0.968400 & -0.109107 & -0.224272 \end{pmatrix}$$

$$7 \quad (0.000000, 13.265878, -13.265878) \quad \begin{pmatrix} 0.154881 & -0.967912 & -0.197886 \\ -0.195485 & -0.226368 & 0.954224 \\ -0.968400 & -0.109107 & -0.224272 \end{pmatrix}$$

$$8 \quad (13.265878, 0.000000, -13.265878) \quad \begin{pmatrix} 0.154881 & -0.967912 & -0.197886 \\ 0.195485 & 0.226368 & -0.954224 \\ 0.968400 & 0.109107 & 0.224272 \end{pmatrix}$$

$$9 \quad (0.000000, -13.265878, 13.265878) \quad \begin{pmatrix} 0.154881 & -0.967912 & -0.197886 \\ -0.195485 & -0.226368 & 0.954224 \\ -0.968400 & -0.109107 & -0.224272 \end{pmatrix}$$

$$10 \quad (13.265878, -13.265878, 0.000000) \quad \begin{pmatrix} -0.154881 & 0.967912 & 0.197886 \\ 0.195485 & 0.226368 & -0.954224 \\ -0.968400 & -0.109107 & -0.224272 \end{pmatrix}$$

$$11 \quad (-13.265878, 0.000000, 13.265878) \quad \begin{pmatrix} 0.154881 & -0.967912 & -0.197886 \\ 0.195485 & 0.226368 & -0.954224 \\ 0.968400 & 0.109107 & 0.224272 \end{pmatrix}$$

$$12 \quad (-13.265878, 13.265878, 0.000000) \quad \begin{pmatrix} -0.154881 & 0.967912 & 0.197886 \\ 0.195485 & 0.226368 & -0.954224 \\ -0.968400 & -0.109107 & -0.224272 \end{pmatrix}$$

|    |                                  |                                                                                                                                       |
|----|----------------------------------|---------------------------------------------------------------------------------------------------------------------------------------|
| 13 | $(0.000000, 0.000000, 0.000000)$ | $\begin{pmatrix} -0.154881 & 0.967912 & 0.197886 \\ -0.195485 & -0.226368 & 0.954224 \\ 0.968400 & 0.109107 & 0.224272 \end{pmatrix}$ |
|----|----------------------------------|---------------------------------------------------------------------------------------------------------------------------------------|

---
